# Supplementary material for: Lupinus albus γ-Conglutin, a Protein Structurally Related to GH12 Xyloglucan-Specific Endo-Glucanase Inhibitor Proteins (XEGIPs), Shows Inhibitory Activity against GH2 β-Mannosidase
Source: MDPI journal article supplement (doi:10.3390/ijms21197305), 2020-10-03
Supplement: s1 [file s1]

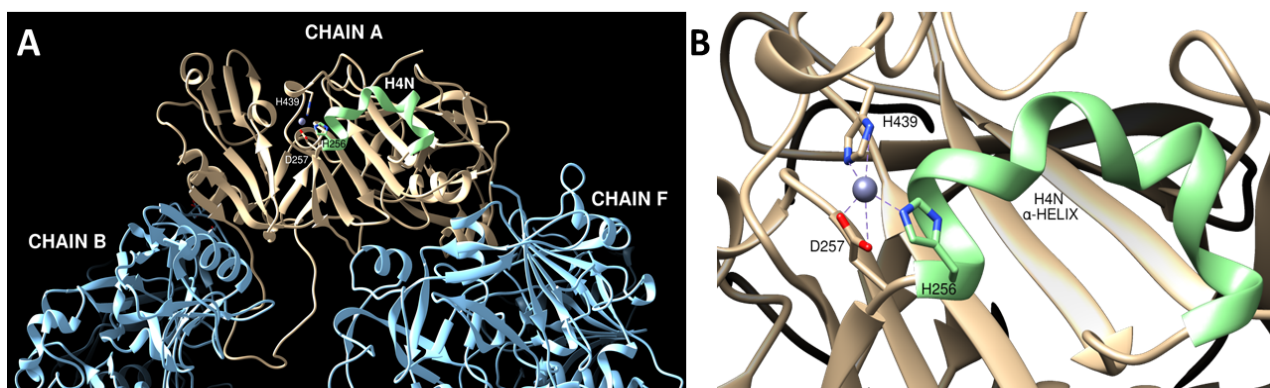

**Supplementary Figure S1.** Surface localization of one of the putative Zn<sup>2+</sup> binding site to conglutin gamma. Panel A shows that the interested region is solvent exposed even in the whole assembled hexameric structure. Panel B shows the magnification of the putative zinc coordination site. Zn<sup>2+</sup> atom is shown in grey; coordinating residues H439, H256 and D257 are displayed in stick representation; H4N  $\alpha$ -helix [21] is colored in light green. Monomer A of  $\gamma$ C is tan colored, while the other monomers forming the quaternary structure are cyan colored. The identification of amino acid residues of  $\gamma$ C potentially involved in zinc coordination was carried out resorting to Metal Ion-Binding Site Prediction and Docking Server (MIB). The predictions identified a region including the inhibitory loop IL2, also present in GH11 and GH12 inhibitors, namely TAXI-I and XEGIP [39]. Within IL2, residue H439 is of key importance as demonstrated earlier in a recombinant mutant version of  $\gamma$ C [20]. This histidine is conserved in TAXI-I IL2, but in XEGIP the same position is occupied by an arginine residue.
