# Supplementary material for: Lupinus albus γ-Conglutin, a Protein Structurally Related to GH12 Xyloglucan-Specific Endo-Glucanase Inhibitor Proteins (XEGIPs), Shows Inhibitory Activity against GH2 β-Mannosidase
Source: MDPI journal article supplement (doi:10.3390/ijms21197305), 2020-10-03
Supplement: s1 [file s1]

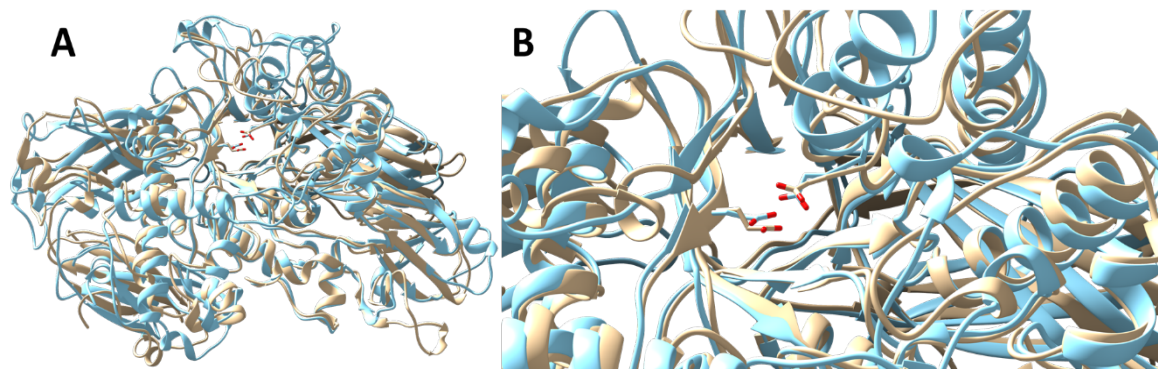

**Supplementary Figure S2.** Structure superposition of ThMan2A (cyan) with GH2 model (tan) created by Swiss model based on the amminoacid sequence of *Cellulomonas fimi* GH2 used in *in vitro* experiments (Panel A). Close up of the active site with catalytic glutammic acids residues highlighted in stick view (Panel B). RMSD of the two matched strucures is 0.987 Å.
